# Supplementary material
Source: publisher figshare collection journal article supplement (https://tandf.figshare.com/ndownloader/files/12534431)
Supplement: Supplementary file 1 [file 12534431]

---

**Permission needed for figures from old manuscript**

---

**Wechsler, H Tobias (ELS-PHI)** <h.wechsler@elsevier.com>

Mon, Oct 9, 2017 at 1:50 PM

To: Erez Koren &lt;erekoren@gmail.com&gt;, Isaac Ginsburg &lt;ginsburg@mail.huji.ac.il&gt;

Dear Drs. Koren and Ginsburg:

Elsevier journal authors retain the right to use or re-use portions or excerpts in other works, subject to proper acknowledgement; see <https://www.elsevier.com/about/our-business/policies/copyright/personal-use>. As this is a retained right, no written permission is necessary to reuse two figures from your prior *Clinical Immunology Newsletter* article in a forthcoming *Critical Reviews in Microbiology* manuscript provided that the material is not credited to any third party and that the original source is properly acknowledged.

If you have additional questions or I may be of further assistance, please let me know.

Best regards,

Hop

**Hop Wechsler**

Permissions Helpdesk Manager

**ELSEVIER** | Global E-Operations Books

+1 215-239-3520 office

h.wechsler@elsevier.com

Contact the Permissions Helpdesk

+1 800-523-4069 x3808 | permissionshelpdesk@elsevier.com

---

**From:** Erez Koren [mailto:[erekoren@gmail.com](mailto:erekoren@gmail.com)]**Sent:** Sunday, October 08, 2017 7:47 AM**To:** Permissions Helpdesk; Wechsler, H Tobias (ELS-PHI); Isaac Ginsburg**Subject:** Permission needed for figures from old manuscript**\*\*\* External email: use caution \*\*\***

Dear Hop,

Hope this email finds you well.

Prof Ginsburg and myself are submitting a review manuscript to "Critical Reviews in Microbiology"  
and want to use two old figures previously published by Prof Ginsburg (figures 1a 1b)

Original manuscript details:

Ginsburg I, Lahav M. [How are bacterial cells degraded by leukocytes in vivo? An enigma](#). Clinical Immunology Newsletter. 1983;4 (11) :147-153.

What is the right way to do it?

Thank you for your assistance

Erez Koren and Isaac Ginsburg
